# Supplementary material for: BTS/ICS guideline for the ventilatory management of acute hypercapnic respiratory failure in adults
Source: HighWire-hosted journal article supplement (doi:10.1136/thoraxjnl-2015-208209), 2016-03-14
Supplement: thoraxjnl-2015-208209supp_Appendix3.pdf [file thoraxjnl-2015-208209supp_Appendix3.pdf]

### **Web Appendix 3**

Slide set which you can download from BTS website, link below:

<https://www.brit-thoracic.org.uk/guidelines-and-quality-standards/ventilatory-management-of-acute-hypercapnic-respiratory-failure-guideline/>
